# Supplementary material for: Drosophila miR-87 promotes dendrite regeneration by targeting the transcriptional repressor Tramtrack69
Source: PubMed Central journal article supplement (PMC7439810; doi:10.1371/journal.pgen.1008942), 2020-08-07
Supplement: pgen.1008942.s001.pdf [file pgen.1008942.s001.pdf]

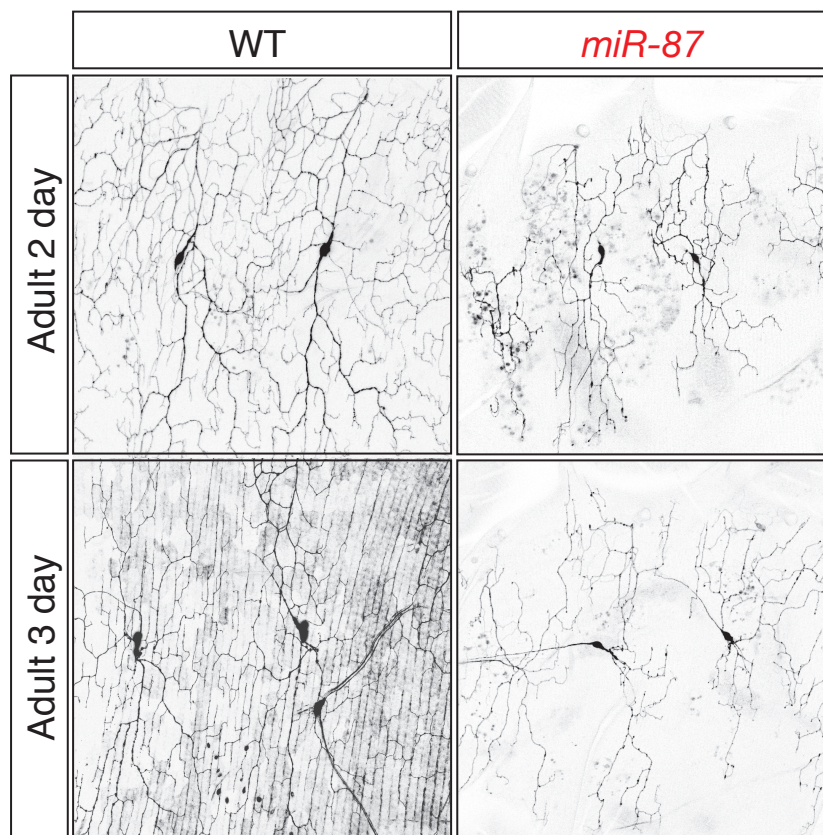

Supplemental Figure S1: *miR-87* is required for dendrite regeneration

Dendrite regeneration in wild-type control (WT) and *miR-87* knockout (*miR-87*) C4da neurons at the indicated time points. Scale bar = 100  $\mu\text{m}$ .

Kitatani et al. Supplemental Figure S1
