# Supplementary material for: Drosophila miR-87 promotes dendrite regeneration by targeting the transcriptional repressor Tramtrack69
Source: PubMed Central journal article supplement (PMC7439810; doi:10.1371/journal.pgen.1008942), 2020-08-07
Supplement: pgen.1008942.s003.pdf [file pgen.1008942.s003.pdf]

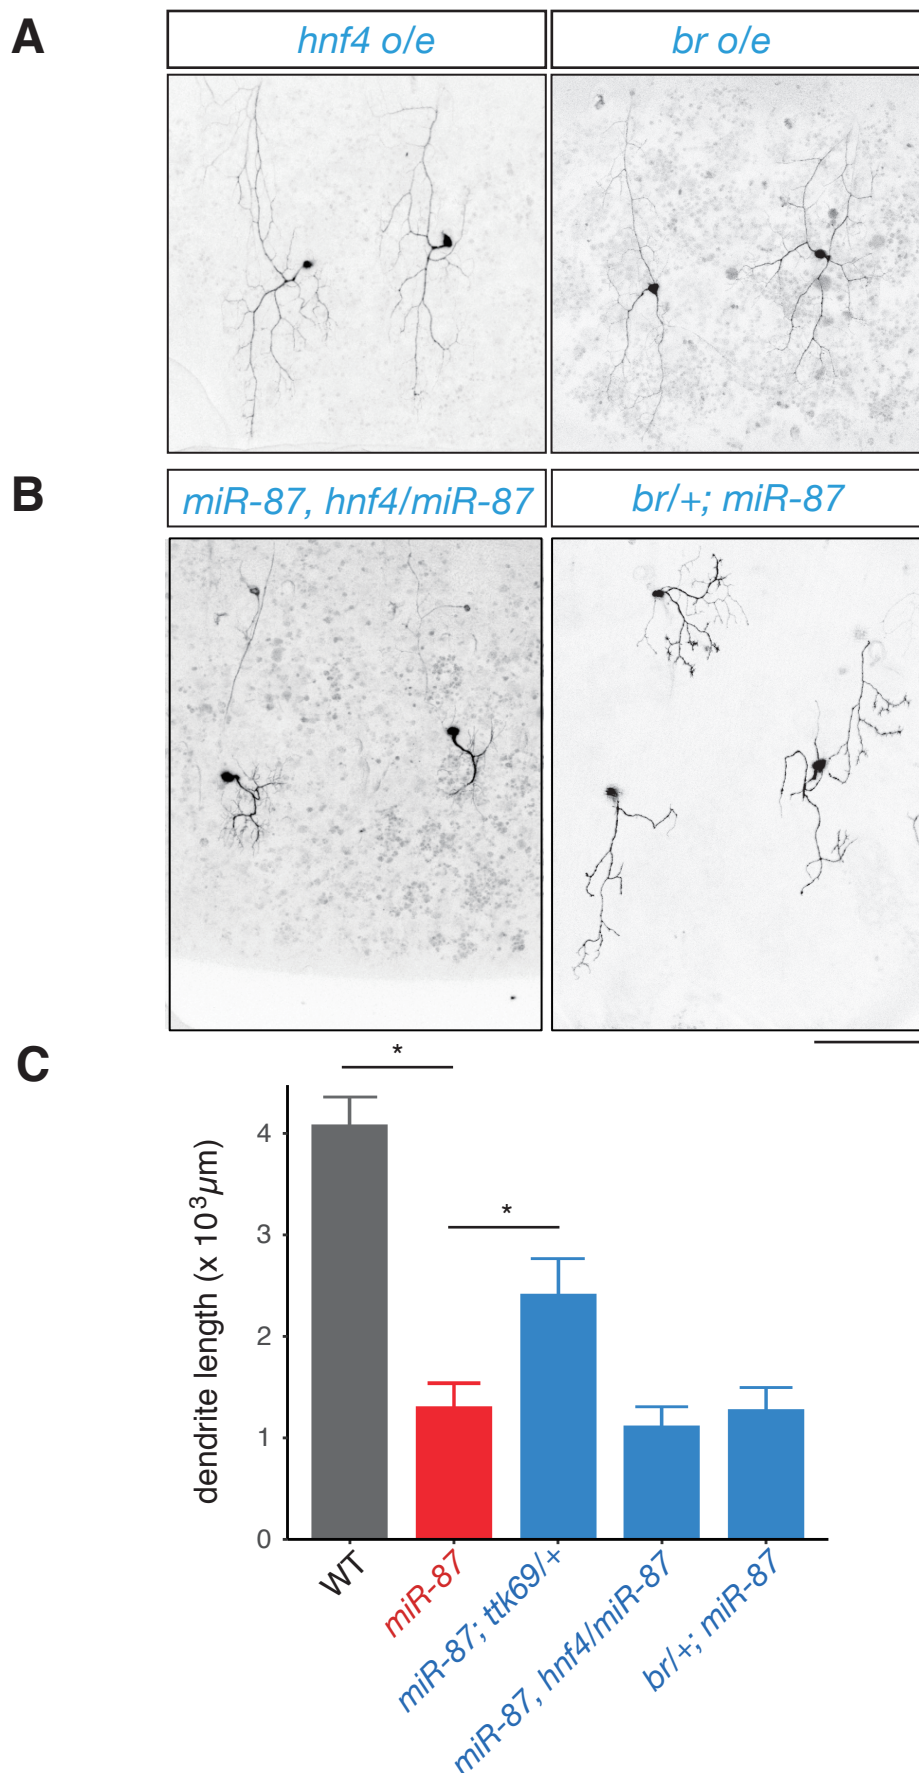

Supplemental Figure S3: *hnf4* and *br* are dispensable for dendrite regeneration defects in *miR-87* neurons.

(A) Overexpression of *hnf4* or *br* causes dendrite regeneration defects. Morphology of *hnf4* overexpressing (*hnf4 o/e*) and *br* overexpressing (*br o/e*) dendrites at 72 hr APF. Scale bar = 100 μm. (B) Reduction of *hnf4* or *br* dosage causes no obvious rescue in dendrite regeneration defects in *miR-87* KO C4da neurons. Morphology of *miR-87* KO with reduction of one copy of *hnf4* (*miR-87, hnf4/miR-87*) or *br* (*br/+; miR-87/miR-87*) dendrites at 96 hrs APF. Scale bar = 100 μm. (C) Quantification of total dendrite length in control wild-type (WT), *miR-87* KO (*miR-87*), *miR-87* KO with reduction of one copy of *ttk69* (*miR-87; ttk69<sup>-/-</sup>*), *miR-87* KO with reduction of one copy of *hnf4* (*miR-87, hnf4/miR-87*), *miR-87* with reduction of one copy of *br* (*br/+; miR-87*) dendrites at 96 hrs APF. n = 15, Error bars indicate mean ± S.D., \*p<0.01(ANOVA with a post hoc Bonferroni correction).
