# Supplementary material for: Drosophila miR-87 promotes dendrite regeneration by targeting the transcriptional repressor Tramtrack69
Source: PubMed Central journal article supplement (PMC7439810; doi:10.1371/journal.pgen.1008942), 2020-08-07
Supplement: pgen.1008942.s004.pdf [file pgen.1008942.s004.pdf]

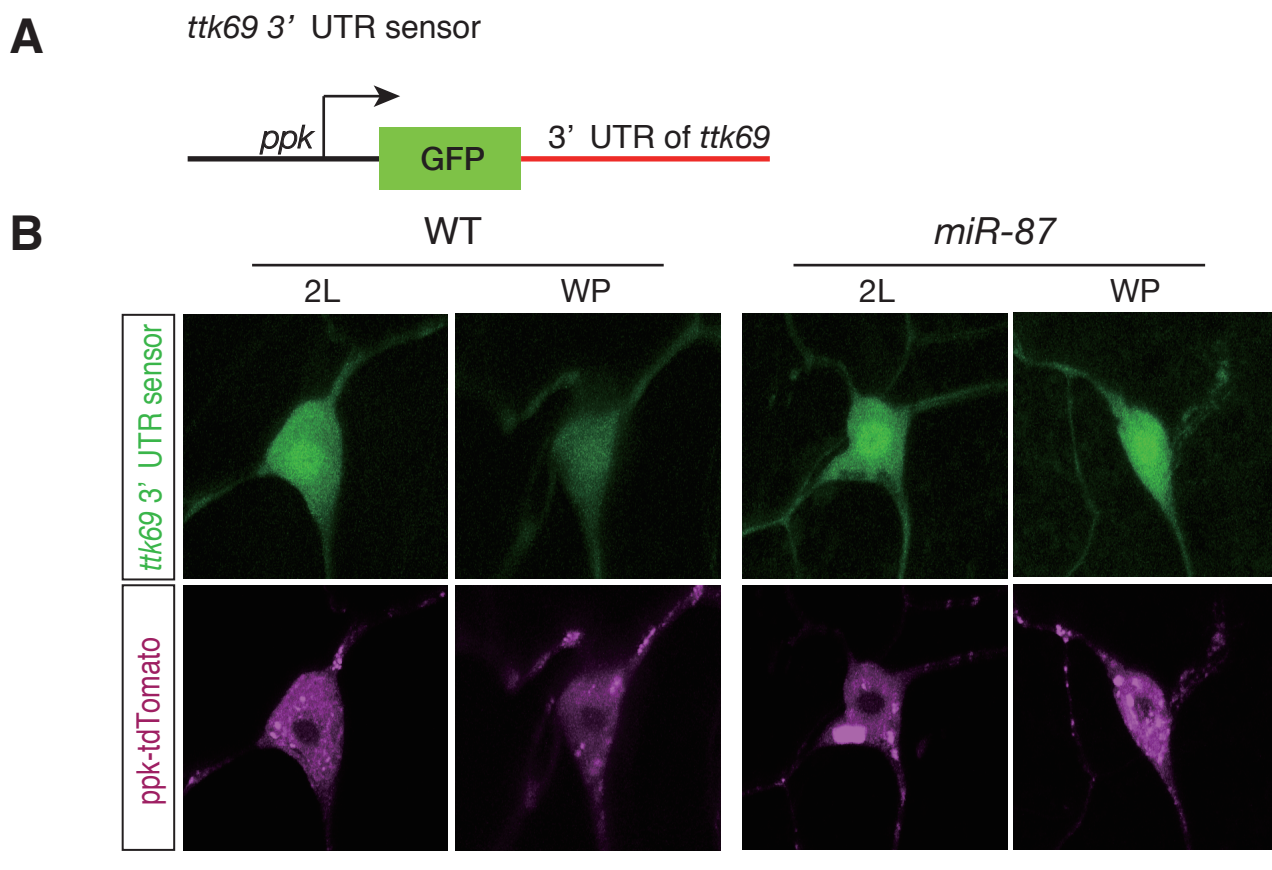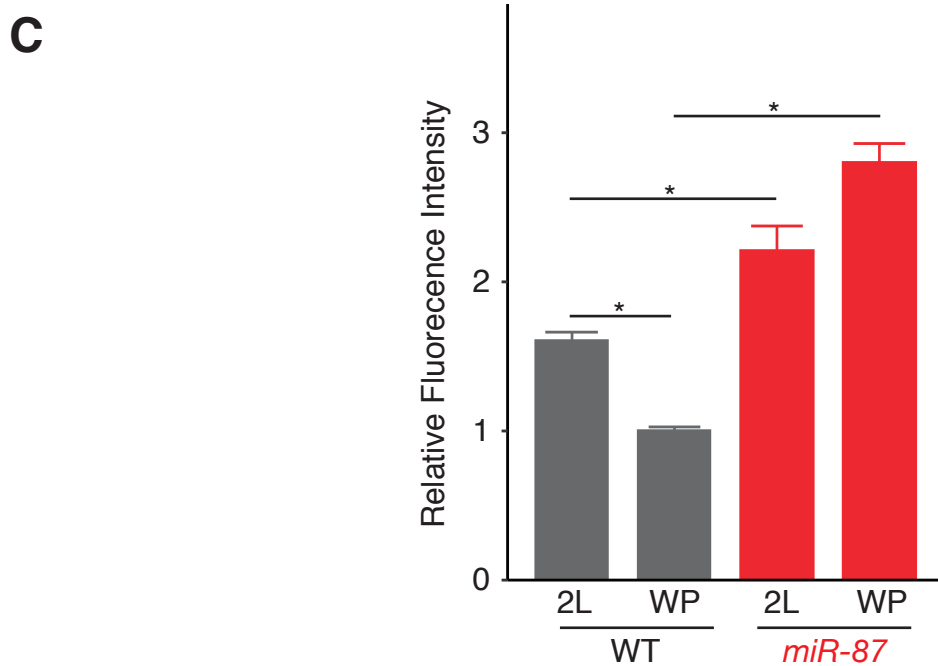

Supplemental Figure S4: Expression of *ttk69*-3' UTR sensor in C4da neurons is suppressed in the larvae-to-pupae transition

(A) A schematic illustration of the *ttk69*-3' UTR sensor construct. (B) Regulated expression of *ttk69*-3' UTR sensor. Images show expression of the *ttk69*-3' UTR sensor in wild-type (WT) and *miR-87* KO mutant (*miR-87*) C4da neurons at 2nd instar larval (2L) and white pupal (WP) additionally expressing ppk-CD4-tdTomato. Scale bar = 20  $\mu$ m. (C) Quantification of *ttk69*-3' UTR sensor GFP expression in C4da neurons at the indicated developmental stages. The *ttk69*-3' UTR sensor fluorescence intensity was normalized to the control sensor fluorescence intensity. n = 25, Error bars indicate mean  $\pm$  S.D, \*p<0.01 (Student' s t-test).
