# Supplementary material for: Drosophila miR-87 promotes dendrite regeneration by targeting the transcriptional repressor Tramtrack69
Source: PubMed Central journal article supplement (PMC7439810; doi:10.1371/journal.pgen.1008942), 2020-08-07
Supplement: pgen.1008942.s005.pdf [file pgen.1008942.s005.pdf]

**A**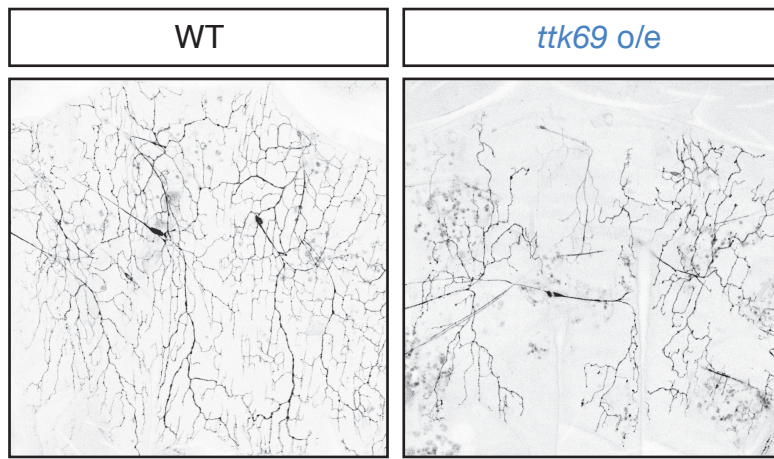**B**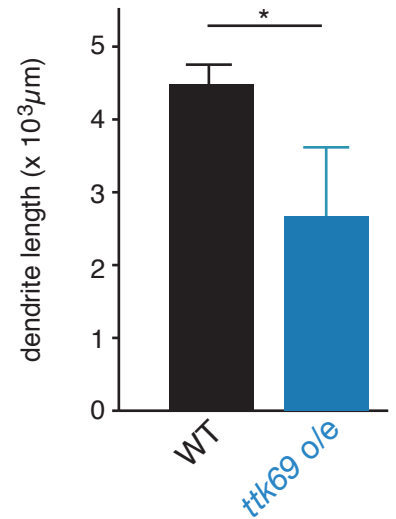**C**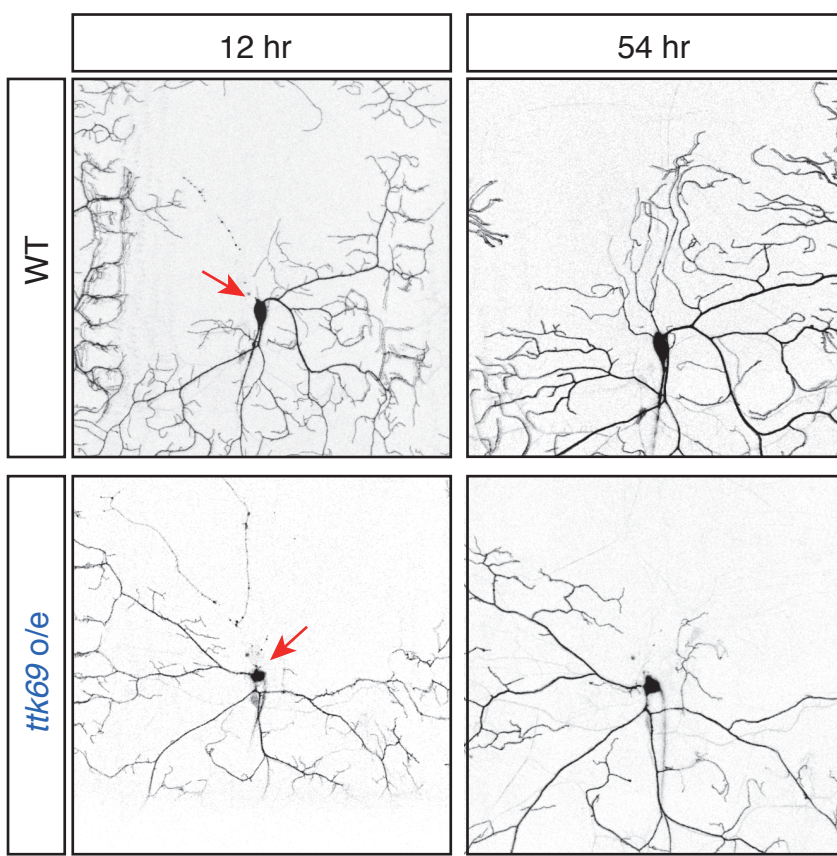**D**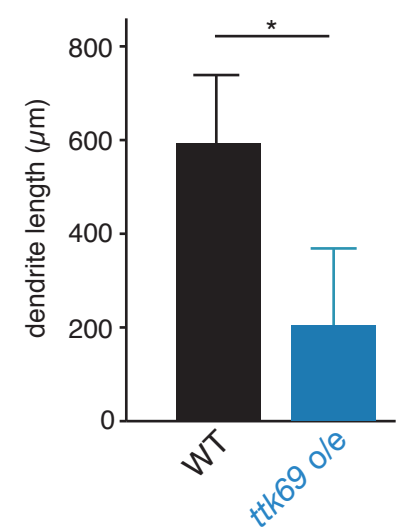

Supplemental Figure S5. *ttk69* overexpression causes dendrite regeneration defects after injury. (A, B) Overexpression of *ttk69* causes dendrite regeneration defects in adult. Morphology of wild-type control (WT) and *ttk69* overexpressing (*ttk69 o/e*) dendrites at adult 1 day (A). Bar = 100 μm. Quantification of total dendrite length in wild-type (WT) and *ttk69* overexpressing (*ttk69 o/e*) neurons (B). Error bar indicates means ± S.D., \* $p < 0.01$  (Student' s t-test). (C, D) Time-lapse images of dendrite regeneration after injury in wild-type (WT) and *ttk69*-overexpressed (*ttk69 o/e*) neurons. Red arrows indicate the site of dendrite severing in 2nd instar larvae (44-48 hr AEL) (C). Scale bar = 50 μm. Quantification of regenerated dendrite length after severing in control wild-type (WT) and *ttk69*-overexpressed (*ttk69 o/e*) neurons at 54 hr after severing.  $n = 6$ , Error bars indicate mean ± S.D., \* $p < 0.05$  (unpaired t-test).
